# Supplementary material for: Ecosystem multifunctionality shows unique stability responses to global change drivers
Source: Research Square preprint supplement (doi:10.21203/rs.3.rs-8626631/v1), 2026-01-30
Supplement: Supplementary file 1 [file fd4af46f348138d3cbe7394f.pdf]

EXTENDED DATA

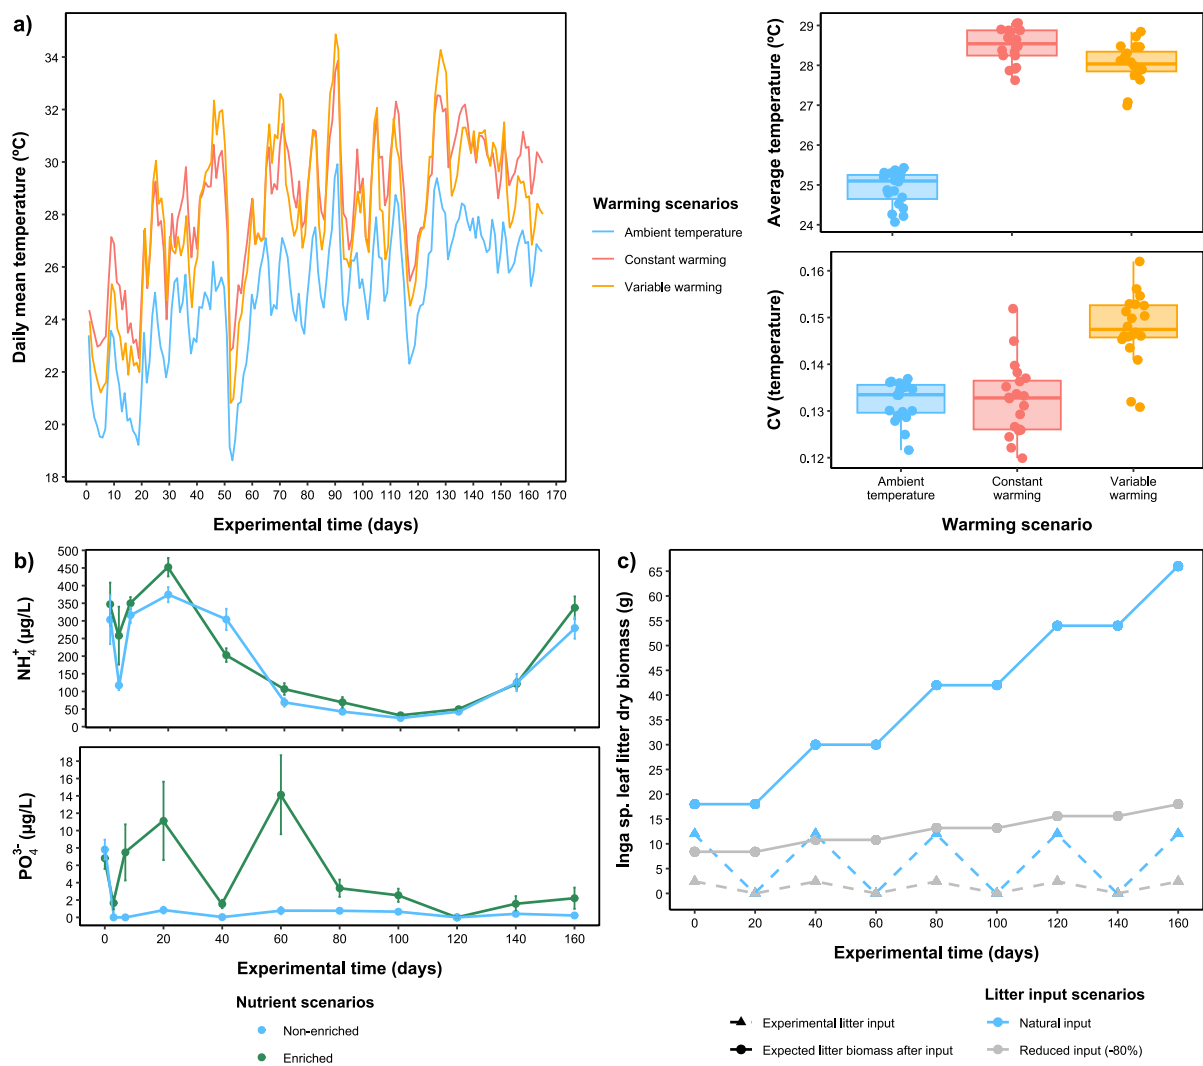

Extended Data Figure 1.

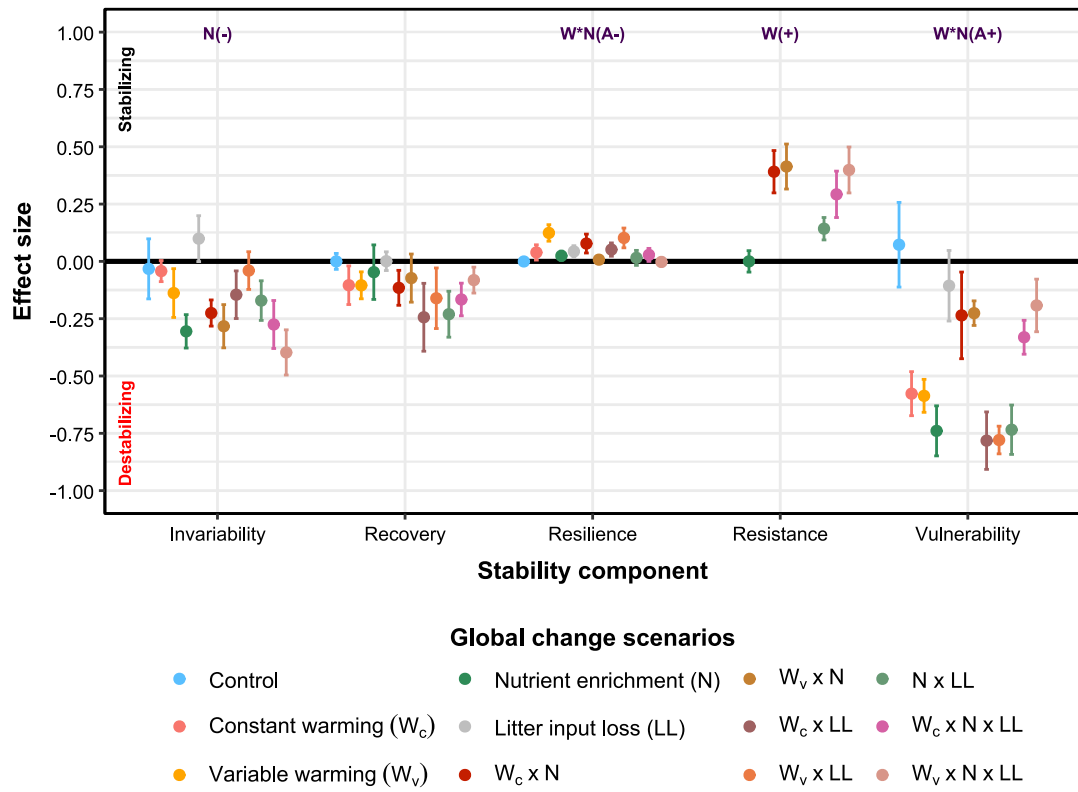

**Extended Data Figure 2.**

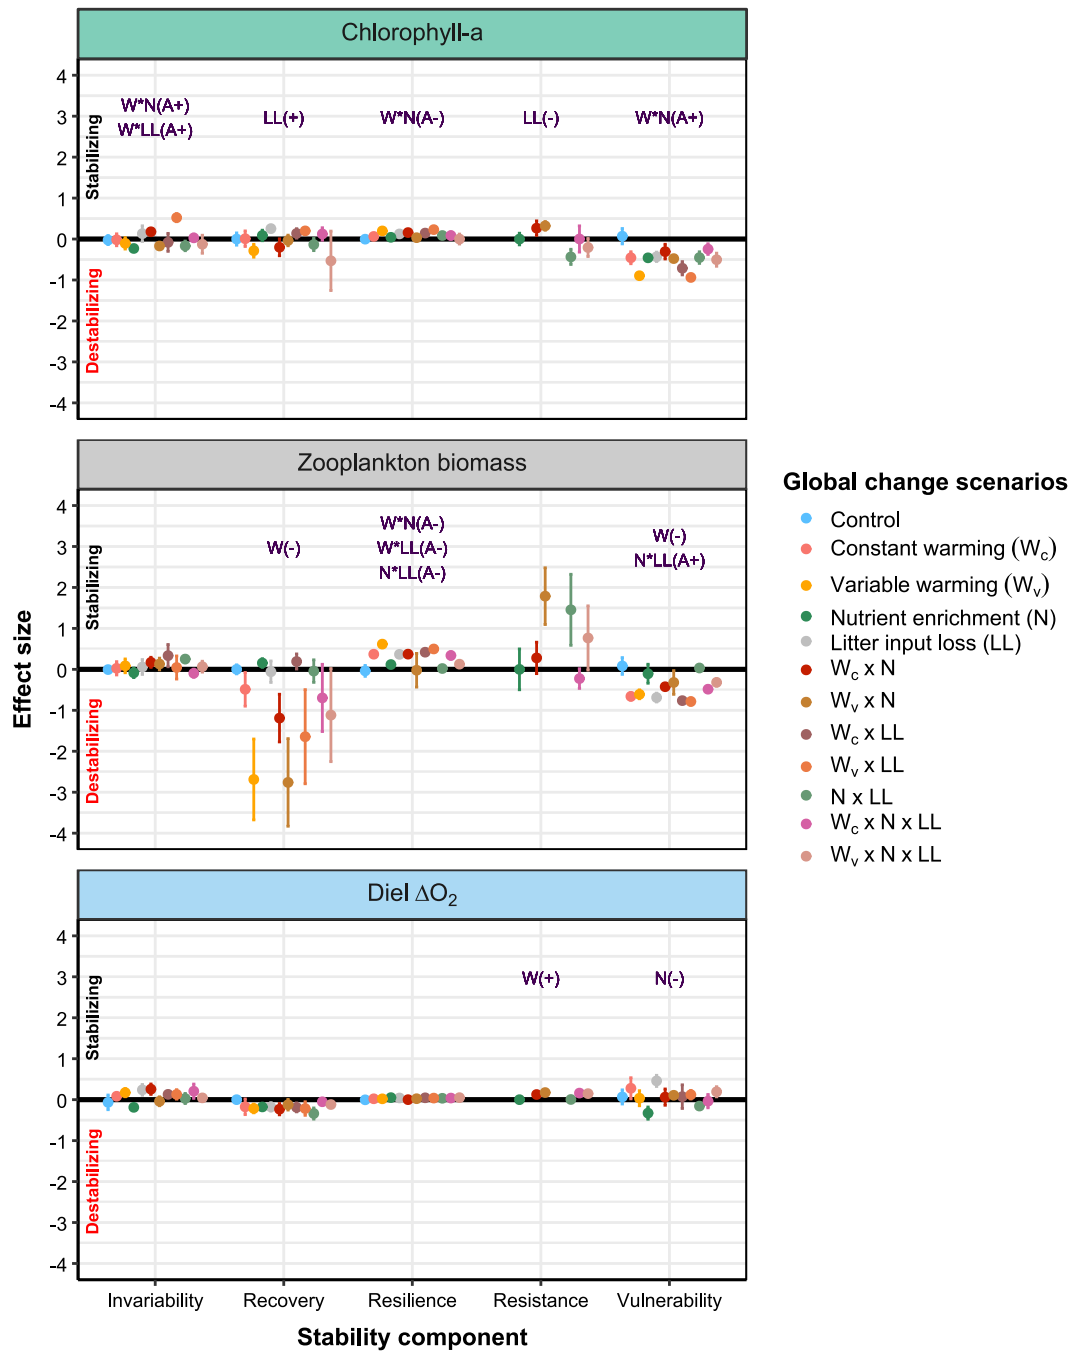

**Extended Data Figure 3.**

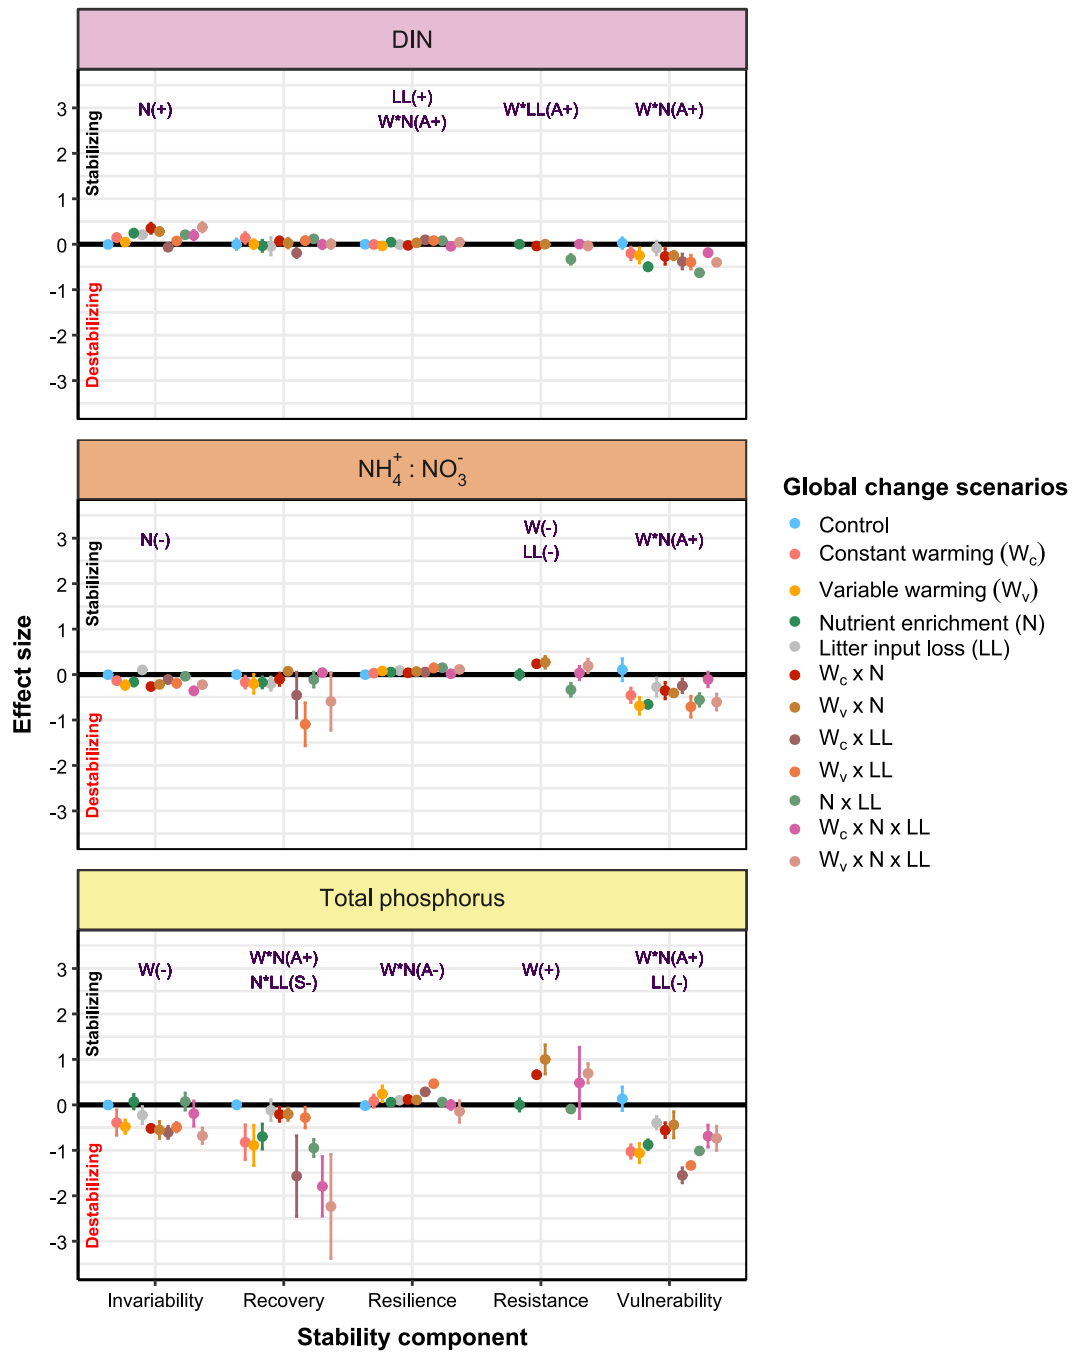

**Extended Data Figure 4.**

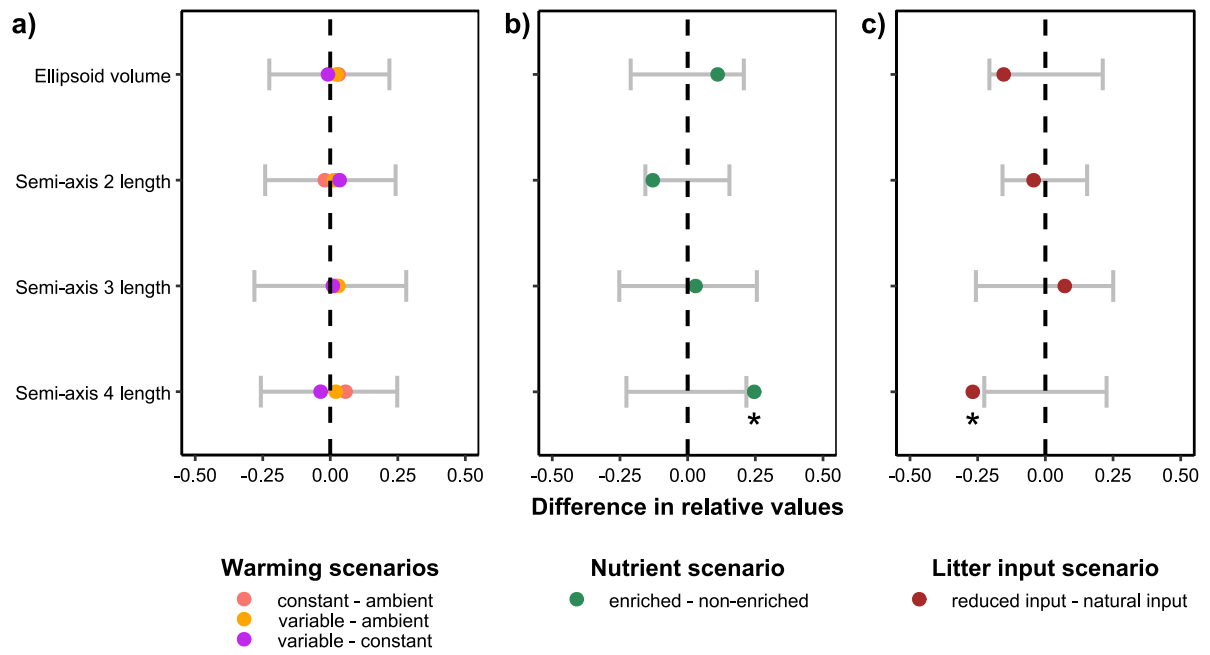

**Extended Data Figure 5.**

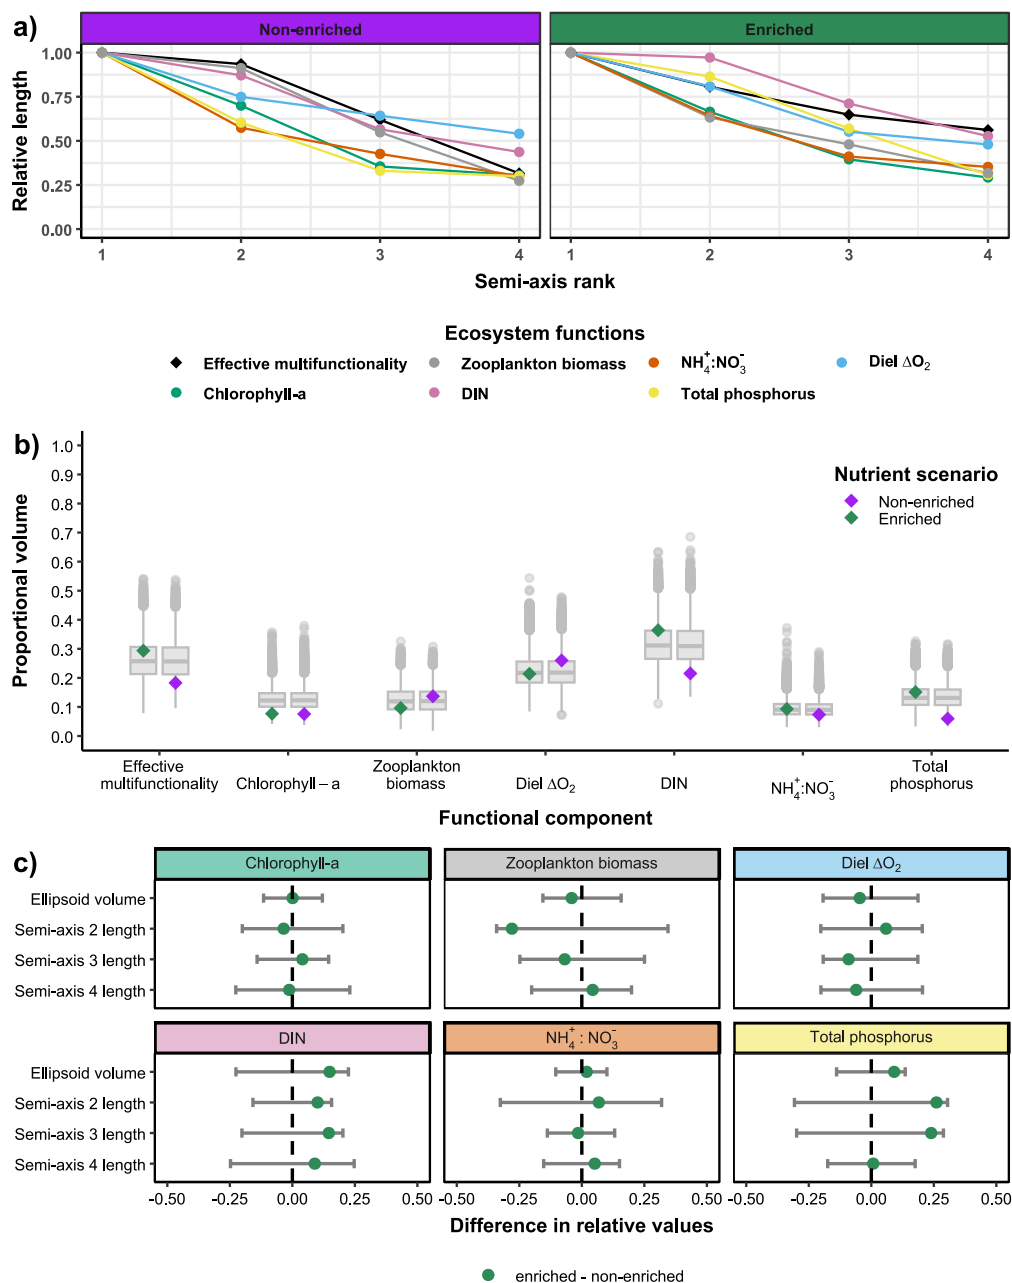

**Extended Data Figure 6.**

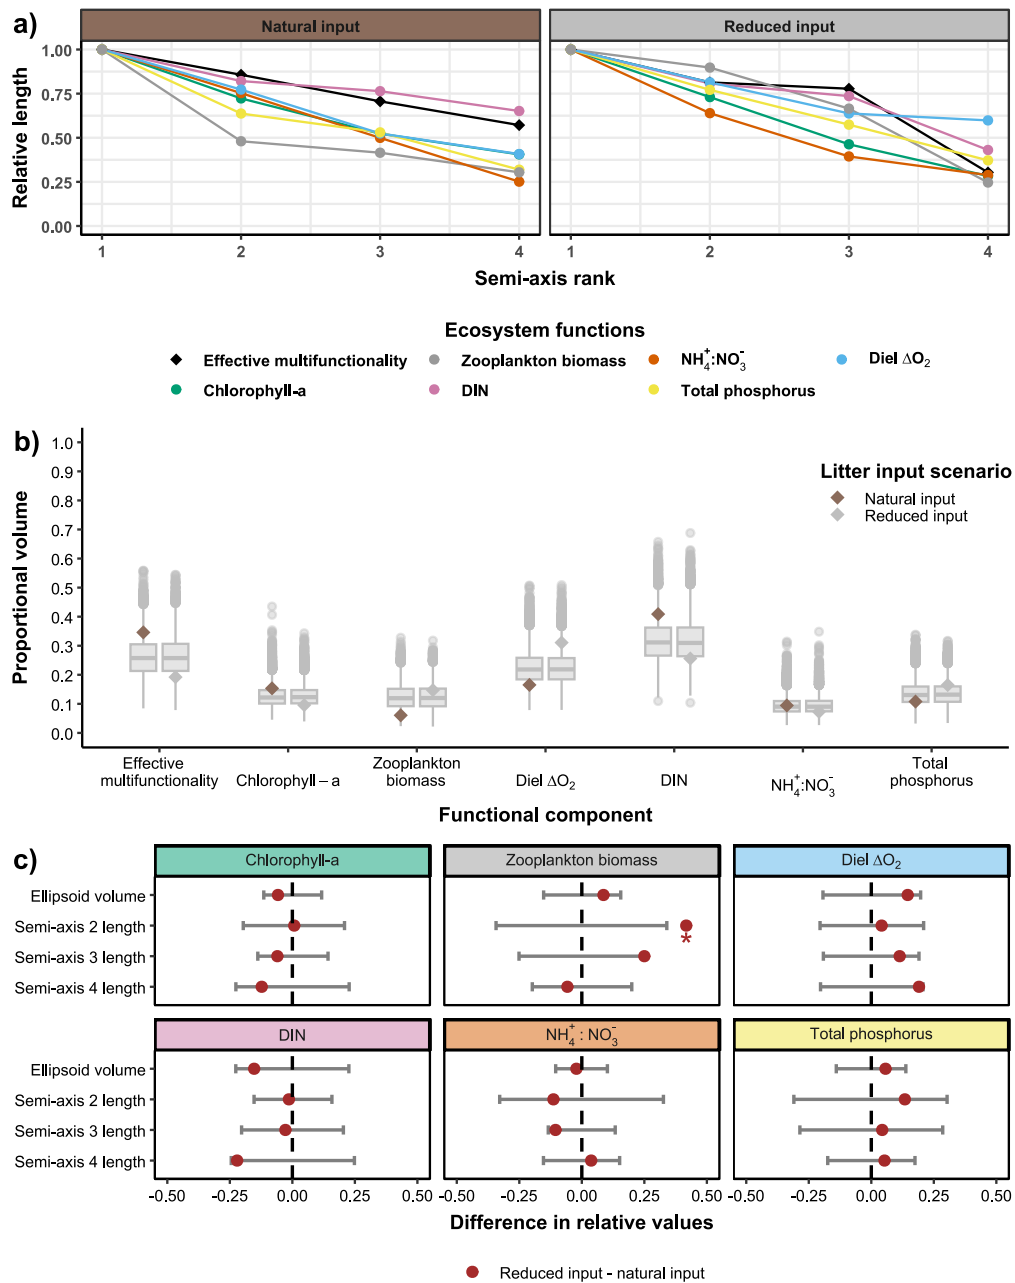

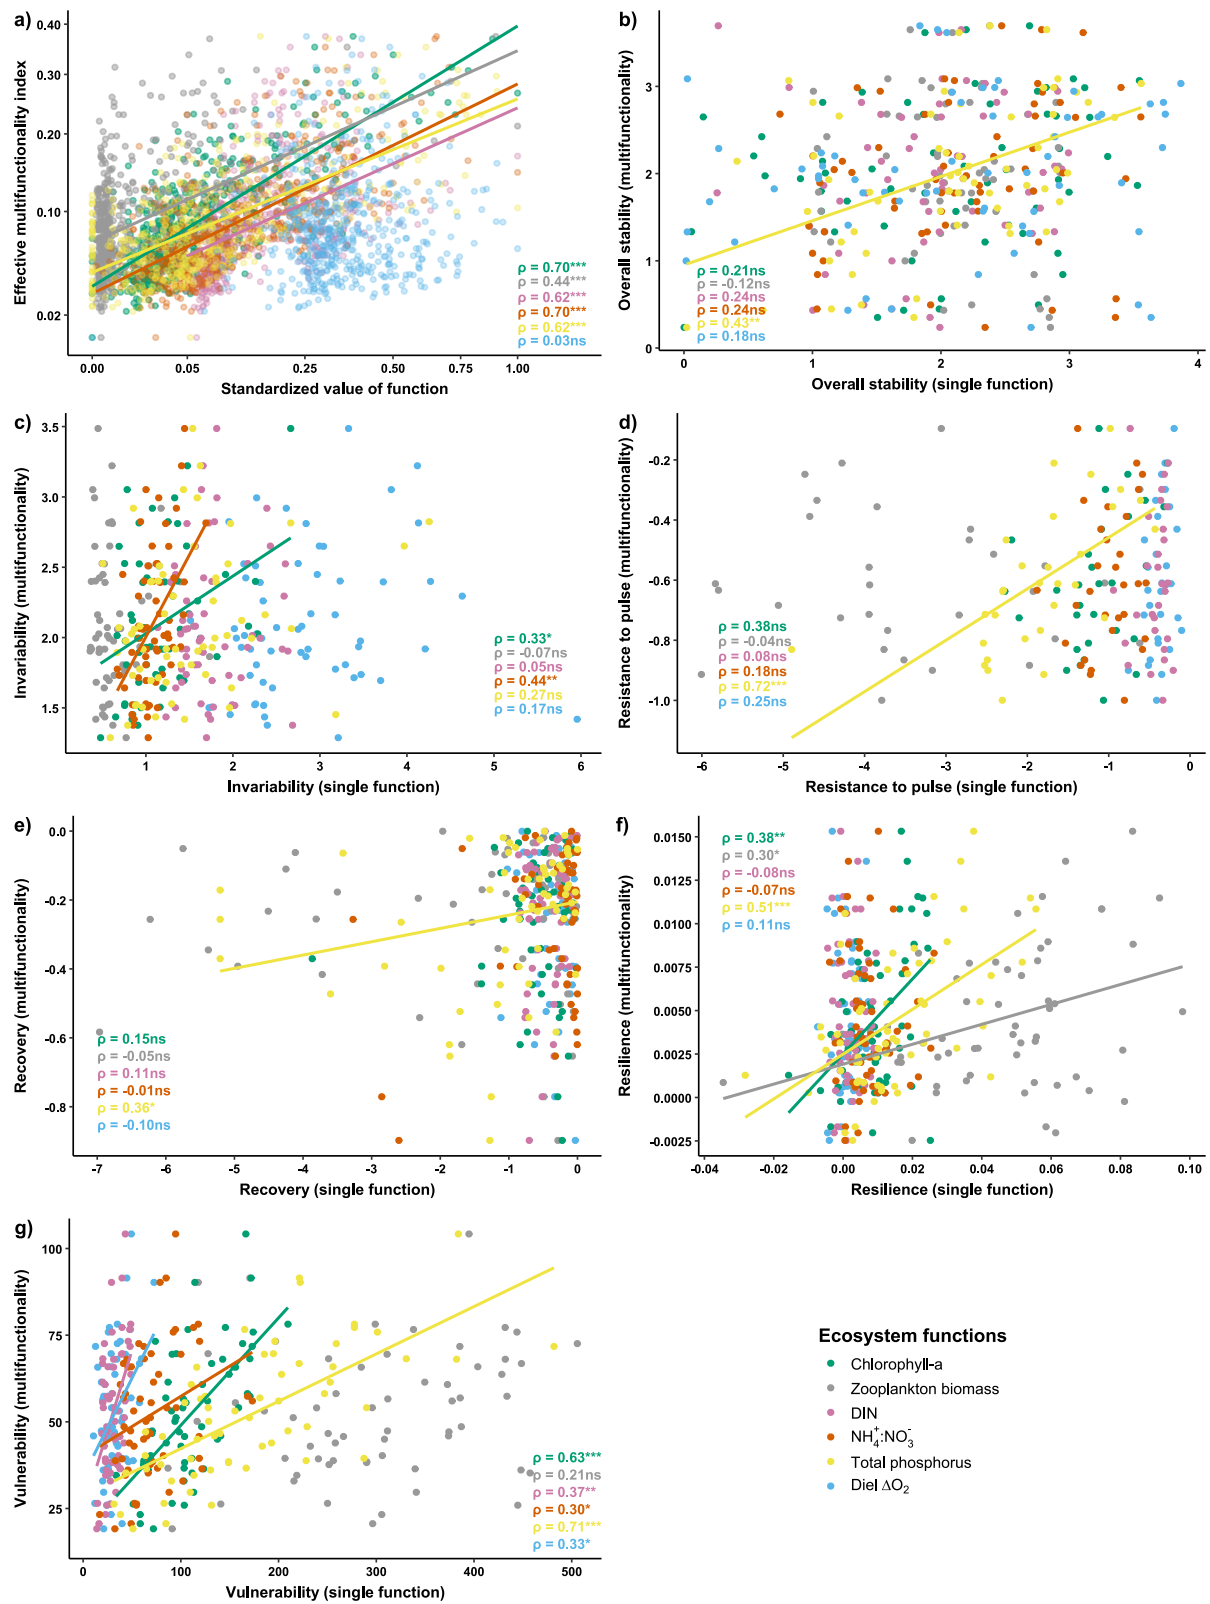

Extended Data Figure 8.
