# Supplementary material for: Ecosystem multifunctionality shows unique stability responses to global change drivers
Source: Research Square preprint supplement (doi:10.21203/rs.3.rs-8626631/v1), 2026-01-30
Supplement: Supplementary file 2 [file 5ce7ec805070542df597a3ba.docx]

**TABLES**

**Table 1. Components of ecosystem stability investigated in this study, their definition and interpretation.**

| Stability componentsA | Time of quantification | Estimation method | Interpretation |
| --- | --- | --- | --- |
| Temporal invariability | From day 20 until the end of the experiment |  | Temporal invariability informs about the magnitude of fluctuations of the ecosystem functions over time. Greater invariability implies greater stability16,18 |
| Resistance to pulse disturbance | From time point of maximum deviation (in absolute values) in the interval after pulse disturbance (day 20 to 60) |  | Resistance refers to an ecosystem’s capacity to withstand disturbances, measured by its ability to maintain functions near undisturbed levels16. As resistance is typically associated with pulse disturbances18,23, our design allowed its estimation only for nutrient-enriched systems. Resistance values range from negative to zero, with zero indicating maximum resistance and greater stability. |
| Final recovery | Final sampling |  | Final recovery informs the degree of recovery of ecosystem functions after a disturbance at similar levels of an undisturbed state18,23. Like resistance, values range up to zero, where zero represents maximum recovery thus greater stability. |
| Resilience | From time point of maximum deviation (in absolute values) in the interval after pulse disturbance (day 20 to 60) to the final sampling |  | Resilience (or “engineering resilience”) is the rate at which an ecosystem returns to its previous functional state after a disturbance16,18. Positive values reflect faster recovery facing given disturbance, while zero or negative values indicate slower recovery, persistence in a disturbed state, or increasing divergence from the undisturbed state. Resilience values were multiplied by -1 in cases where treatment effect promoted overperformance (i.e. maximum deviation from the control was positive). |
| Overall ecosystem vulnerability (OEV) | From day 20 until the end of the experiment |  | OEV quantifies long-term accumulated effects of a disturbance over time. Although originally proposed as an integrative stability metric20, in this study it was strongly correlated with resistance (*ρ* = -0.86, p <0.001). Therefore, we interpreted OEV as a proxy for long-term sensitivity to both press and pulse disturbances, where higher values reflect lower “long-term resistance” and reduced stability |
| A Stability metrics were measured at mesocosm level. Measures of functional stability were based upon standardized values of ecosystem functions and effective multifunctionality index (see Methods). | | | |
